# Supplementary material
Source: Springer Nature journal article supplement (https://www.springermedizin.de/resource/supplementary/13014_2007_90_MOESM4_ESM.pdf/9632898)

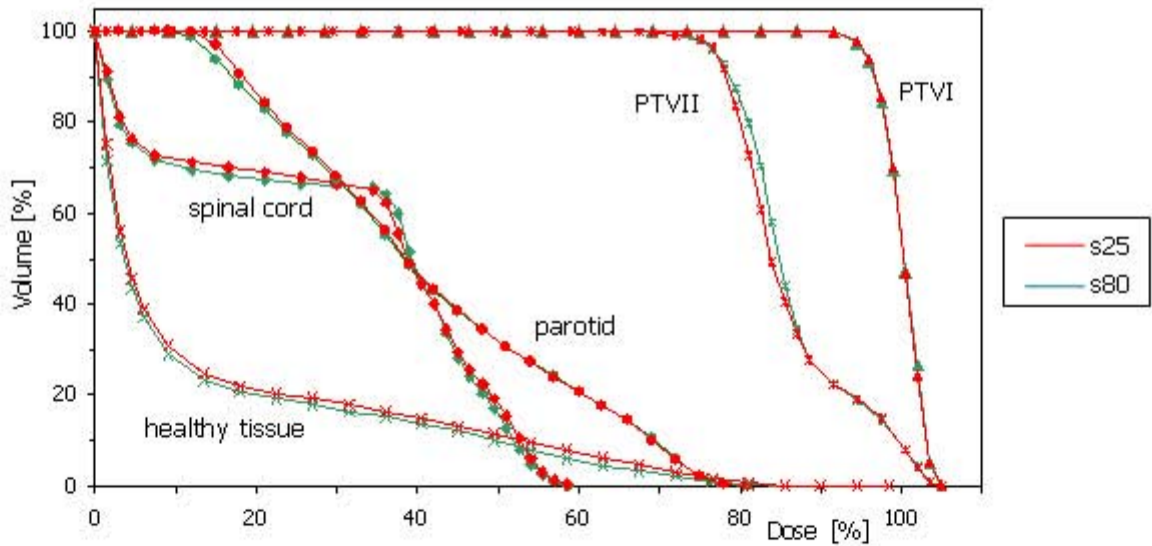

Supplement: MOESM4 [file 9632898]
